# Supplementary material
Source: publisher figshare collection journal article supplement (https://frontiersin.figshare.com/ndownloader/files/31527734)
Supplement: Supplementary file [file 31527734]

**Supplementary Table S2.** Threshold cycle (Ct) values of *SOX2*, *OCT4*, *NANOG*, *KLF4* genes calculated by RT-qPCR. The table represents Ct values – the number of cycles necessary to determine the level of gene expression. For every cell line (AF-MSC, EndSC, MenSC), there is a representative Ct value listed according to a specific gene (n=6).

| <b>Cell lines \ Genes</b> | <b><i>SOX2</i></b>                               | <b><i>OCT4</i></b> | <b><i>NANOG</i></b> | <b><i>KLF4</i></b> |
|---------------------------|--------------------------------------------------|--------------------|---------------------|--------------------|
|                           | Threshold cycle (Ct) values generated in RT-qPCR |                    |                     |                    |
| AF-MSC                    | 30                                               | 24                 | 25                  | 25                 |
| EndSC                     | 31                                               | 24 ± 1             | 23-24               | 26 ± 1             |
| MenSC                     | 30 ± 1                                           | 24 ± 1             | 24-25               | 27 ± 1             |
